# Supplementary material for: Artificial intelligence and health inequities in primary care: a systematic scoping review and framework
Source: HighWire-hosted journal article supplement (doi:10.1136/fmch-2022-001670), 2022-11-01
Supplement: fmch-2022-001670supp001_data_supplement.pdf [file fmch-2022-001670supp001_data_supplement.pdf]

Annex 1: A priori conceptual framework of AI and HI in primary care

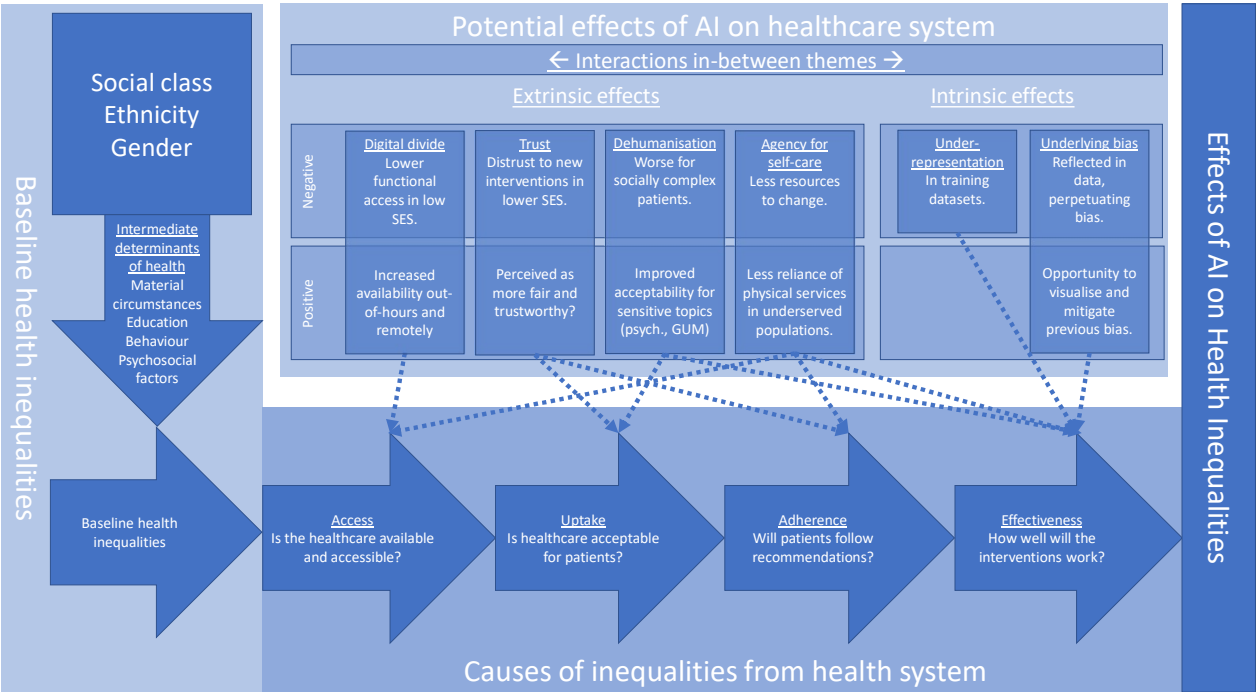

A priori conceptual framework for how AI may affect health inequities in and through primary care.
