# Supplementary material for: Artificial intelligence and health inequities in primary care: a systematic scoping review and framework
Source: HighWire-hosted journal article supplement (doi:10.1136/fmch-2022-001670), 2022-11-01
Supplement: fmch-2022-001670supp002_data_supplement.pdf [file fmch-2022-001670supp002_data_supplement.pdf]

## Annex 2: Search terms

| Database →                                                                                                                                                                                        | Pubmed/Medline (MeSH where possible) All 10yr+Eng                                                                                                                                                             | Scopus (And other databases with no MeSH) All 2011 + Eng                                                                                                                                                                                                                                                                                                                                                                                                                                                                                         | JSTOR Journals, 2011, Eng                                                                                                                    |
|---------------------------------------------------------------------------------------------------------------------------------------------------------------------------------------------------|---------------------------------------------------------------------------------------------------------------------------------------------------------------------------------------------------------------|--------------------------------------------------------------------------------------------------------------------------------------------------------------------------------------------------------------------------------------------------------------------------------------------------------------------------------------------------------------------------------------------------------------------------------------------------------------------------------------------------------------------------------------------------|----------------------------------------------------------------------------------------------------------------------------------------------|
| Topic covered                                                                                                                                                                                     |                                                                                                                                                                                                               |                                                                                                                                                                                                                                                                                                                                                                                                                                                                                                                                                  |                                                                                                                                              |
| <i>Ai and health equity.</i>                                                                                                                                                                      | ("artificial intelligence"[MeSH Terms]) AND (("Health Services Accessibility"[MeSH Terms]) OR ("human rights"[MeSH Terms]))<br><br>588 (10 yr, English)<br><br>Note: Equity falls under Human Rights in MeSH. | TITLE-ABS-KEY ( "artificial intelligence" AND "health" AND ( "human rights" OR inequality OR equality OR equity OR inequity OR accessib* ) ) AND ( LIMIT-TO ( PUBYEAR , 2021 ) OR LIMIT-TO ( PUBYEAR , 2020 ) OR LIMIT-TO ( PUBYEAR , 2019 ) OR LIMIT-TO ( PUBYEAR , 2018 ) OR LIMIT-TO ( PUBYEAR , 2017 ) OR LIMIT-TO ( PUBYEAR , 2016 ) OR LIMIT-TO ( PUBYEAR , 2015 ) OR LIMIT-TO ( PUBYEAR , 2014 ) OR LIMIT-TO ( PUBYEAR , 2013 ) OR LIMIT-TO ( PUBYEAR , 2012 ) OR LIMIT-TO ( PUBYEAR , 2011 ) ) AND ( LIMIT-TO ( LANGUAGE , "English" ) ) | (((("artificial intelligence") AND ("healthcare" OR "health care")) AND (equality OR equity OR inequality OR inequity)))) AND la:(eng OR en) |
| <i>AI's impact on primary care provision.</i>                                                                                                                                                     | ("artificial intelligence"[MeSH Terms]) AND (("general practice"[MeSH Terms]) OR ("primary care"[All Fields]))                                                                                                | "artificial intelligence" AND ("general practice" OR "primary care")                                                                                                                                                                                                                                                                                                                                                                                                                                                                             | ("artificial intelligence") AND ("general practice" OR "primary care")                                                                       |
| <i>Practical implementation of AI in a system and the subsequent role of the infrastructures, organisational processes and personal involved, and how implementation could affect inequality.</i> | ("artificial intelligence"[MeSH Terms]) AND (("general practice"[MeSH Terms]) OR ("primary care"[All Fields])) AND (("implementation"[All Fields]) OR "social practice" OR "technology-in-practice")          | ( ( ( "artificial intelligence" ( "general practice" OR "primary care" ) "implementation" ) ) OR ( "artificial intelligence" ( "social practice" OR "technology-in-practice" ) ) )                                                                                                                                                                                                                                                                                                                                                               | ("artificial intelligence" OR "machine learning") ("social practice" OR "technology-in-practice")                                            |
