# Supplementary material for: Artificial intelligence and health inequities in primary care: a systematic scoping review and framework
Source: HighWire-hosted journal article supplement (doi:10.1136/fmch-2022-001670), 2022-11-01
Supplement: fmch-2022-001670supp004_data_supplement.pdf [file fmch-2022-001670supp004_data_supplement.pdf]

## Annex 4: GRIPP2 Short Form of public involvement

Adapted from Staniszewska et al (1).

| Section and topic:                  | Item:                                                                                                                                     | Reported in section:               |
|-------------------------------------|-------------------------------------------------------------------------------------------------------------------------------------------|------------------------------------|
| 1: Aim                              | Report the aim of PPI in the study                                                                                                        | Methods: Public Involvement        |
| 2: Methods                          | Provide a clear description of the methods used for PPI in the study                                                                      | Methods: Public Involvement        |
| 3: Study results                    | Outcomes—Report the results of PPI in the study, including both positive and negative outcomes                                            | Results: Selection of Publications |
| 4: Discussion and conclusions       | Outcomes—Comment on the extent to which PPI influenced the study overall. Describe positive and negative effects                          | Discussion                         |
| 5: Reflections/critical perspective | Comment critically on the study, reflecting on the things that went well and those that did not, so others can learn from this experience | Discussion                         |

1. Staniszewska S, Brett J, Simera I, Seers K, Mockford C, Goodlad S, et al. GRIPP2 reporting checklists: tools to improve reporting of patient and public involvement in research. *bmj*. 2017;358.
